# Supplementary material for: Endotoxins from a Pharmacopoeial Point of View
Source: MDPI journal article supplement (doi:10.3390/toxins10080331), 2018-08-16
Supplement: s1 [file s1]

# Supplementary Materials: Endotoxins from a Pharmacopoeial Point of View

Elvira Franco, Verónica Garcia-Recio, Pilar Jiménez, Manuel Garrosa, Tomás Girbés, Manuel Cordoba-Diaz and Damián Cordoba-Diaz

**Table S1.** Comparative analysis of the BET conditions between IP, USP, JP, EP and also BP and RFE

| Conditions     |                                   | IP                                                                                                                                                                              | USP                                                                                                                                                   | JP                                                                                                                                                              | EP                                                                                                                                                    | BP                                                                                                                                                                | RFE                                                                                                                                                               |
|----------------|-----------------------------------|---------------------------------------------------------------------------------------------------------------------------------------------------------------------------------|-------------------------------------------------------------------------------------------------------------------------------------------------------|-----------------------------------------------------------------------------------------------------------------------------------------------------------------|-------------------------------------------------------------------------------------------------------------------------------------------------------|-------------------------------------------------------------------------------------------------------------------------------------------------------------------|-------------------------------------------------------------------------------------------------------------------------------------------------------------------|
| Apparatus      |                                   | Hot-air oven<br>(30 min at 250 °C)                                                                                                                                              |                                                                                                                                                       |                                                                                                                                                                 |                                                                                                                                                       |                                                                                                                                                                   |                                                                                                                                                                   |
| Reagents       |                                   | <ul style="list-style-type: none"> <li>▪ Amoebocyte lysate</li> <li>▪ Water for bacterial endotoxins test (BET)</li> <li>▪ Lysate solution</li> </ul>                           | <ul style="list-style-type: none"> <li>▪ Amoebocyte lysate</li> <li>▪ Water for bacterial endotoxins test (BET)</li> <li>▪ Lysate solution</li> </ul> |                                                                                                                                                                 | <ul style="list-style-type: none"> <li>▪ Amoebocyte lysate</li> <li>▪ Water for bacterial endotoxins test (BET)</li> <li>▪ Lysate solution</li> </ul> | <ul style="list-style-type: none"> <li>▪ Amoebocyte lysate</li> <li>▪ Water for bacterial endotoxins test (BET)</li> <li>▪ Lysate solution</li> </ul>             | <ul style="list-style-type: none"> <li>▪ Amoebocyte lysate</li> <li>▪ Water for bacterial endotoxins test (BET)</li> <li>▪ Lysate solution</li> </ul>             |
| Test solutions | Standard Endotoxin Stock Solution | From the WHO International Standard for endotoxin or an endotoxin reference standard that has been calibrated against the WHO International Standard for endotoxin.             | From a USP Endotoxin Reference Standard that has been calibrated to the current WHO International Standard for Endotoxin.                             | From Japanese Pharmacopoeia Reference Standard Endotoxin that has been calibrated to the current WHO International Standard for Endotoxin, using water for BET. | From an endotoxin reference standard that has been calibrated against the International Standard, for example endotoxin standard BRP.                 | From an endotoxin reference standard that has been calibrated against the International Standard, for example endotoxin standard BRP.                             | From an endotoxin reference standard that has been calibrated against the International Standard, for example endotoxin standard BRP.                             |
|                | Standard Endotoxin Solution       | Serial dilutions of the standard endotoxin stock solution using water for BET                                                                                                   |                                                                                                                                                       |                                                                                                                                                                 |                                                                                                                                                       |                                                                                                                                                                   |                                                                                                                                                                   |
|                | Sample Solutions                  | <ul style="list-style-type: none"> <li>▪ Dissolve or dilute the pharmaceutical substance or the finished preparation using water BET.</li> <li>▪ Adjust pH (6.0-8.0)</li> </ul> | <ul style="list-style-type: none"> <li>▪ Dissolve or dilute drugs using water for BET</li> <li>▪ Adjust pH (6.0-8.0)</li> </ul>                       | <ul style="list-style-type: none"> <li>▪ Dissolve or dilute drugs using water for BET</li> <li>▪ Adjust pH (6.0-8.0)</li> </ul>                                 | <ul style="list-style-type: none"> <li>▪ Dissolve or dilute active substances or medicinal products using water for BET</li> </ul>                    | <ul style="list-style-type: none"> <li>▪ Dissolve or dilute active substances or medicinal products using water for BET</li> <li>▪ Adjust pH (6.0-8.0)</li> </ul> | <ul style="list-style-type: none"> <li>▪ Dissolve or dilute active substances or medicinal products using water for BET</li> <li>▪ Adjust pH (6.0-8.0)</li> </ul> |

|                                                      |  |                                                                                                                                                                                                                                                                                                                                                                                                                                                                                                                                                                                                                                                                                                                                                                                                                                                                                                                                   |  |  |                       |  |  |
|------------------------------------------------------|--|-----------------------------------------------------------------------------------------------------------------------------------------------------------------------------------------------------------------------------------------------------------------------------------------------------------------------------------------------------------------------------------------------------------------------------------------------------------------------------------------------------------------------------------------------------------------------------------------------------------------------------------------------------------------------------------------------------------------------------------------------------------------------------------------------------------------------------------------------------------------------------------------------------------------------------------|--|--|-----------------------|--|--|
|                                                      |  |                                                                                                                                                                                                                                                                                                                                                                                                                                                                                                                                                                                                                                                                                                                                                                                                                                                                                                                                   |  |  | ▪ Adjust pH (6.0-8.0) |  |  |
| <b>Determination of Maximum Valid Dilution (MVD)</b> |  | $MVD = \frac{\text{endotoxin limit} \times \text{concentration of test solution}}{\lambda}$ <p>▪ <b>Endotoxin limit:</b> for parenteral preparations, defined on the basis of dose = <math>\frac{K}{M}</math></p> <p>K: threshold pyrogenic dose of endotoxin per kilogram of body mass</p> <p>M: maximum recommended bolus dose of product per kilogram of body mass</p> <p>▪ <b>Concentration of test solution:</b></p> <ul style="list-style-type: none"> <li>– mg/mL if the endotoxin limit is specified by mass (IU/mg),</li> <li>– Units/mL if the endotoxin limit is specified by unit of biological activity (IU/Unit),</li> <li>– ml/mL if the endotoxin limit is specified by volume (IU/mL).</li> </ul> <p>▪ <b><math>\lambda</math>:</b> the labelled lysate sensitivity in the gel-clot technique (IU/mL) or the lowest concentration used in the standard curve of the turbidimetric or chromogenic techniques.</p> |  |  |                       |  |  |

**Table S2:** Comparative analysis of the Gel-clot techniques between IP, USP, JP, EP and also BP and RFE

| Gel-clot techniques                                           |            | IP                                                                          | USP                                                                   | JP                                                              | EP                                                                    | BP                                                                    | RFE                                                                   |
|---------------------------------------------------------------|------------|-----------------------------------------------------------------------------|-----------------------------------------------------------------------|-----------------------------------------------------------------|-----------------------------------------------------------------------|-----------------------------------------------------------------------|-----------------------------------------------------------------------|
| Limit test                                                    |            | Method A                                                                    |                                                                       |                                                                 | Method A                                                              | Method A                                                              | Method A                                                              |
| Quantitative test                                             |            |                                                                             |                                                                       |                                                                 | Method B                                                              | Method B                                                              | Method B                                                              |
| Preparatory testing                                           |            |                                                                             |                                                                       |                                                                 |                                                                       |                                                                       |                                                                       |
| Confirmation of the labelled lysate sensitivity ( $\lambda$ ) |            |                                                                             |                                                                       |                                                                 |                                                                       |                                                                       |                                                                       |
| Replicates                                                    |            | 4                                                                           | 4                                                                     | -                                                               | 4                                                                     | 4                                                                     | 4                                                                     |
| Standard solutions<br>(concentrations equivalent)             |            | $2\lambda, \lambda, 0.5\lambda, 0.25\lambda$                                | $2\lambda, \lambda, 0.5\lambda, 0.25\lambda$                          | $2\lambda, \lambda, 0.5\lambda, 0.25\lambda$                    | $2\lambda, \lambda, 0.5\lambda, 0.25\lambda$                          | $2\lambda, \lambda, 0.5\lambda, 0.25\lambda$                          | $2\lambda, \lambda, 0.5\lambda, 0.25\lambda$                          |
| Procedure                                                     |            | Mix 1 volume Lysate solution + 1 volume standard solution                   | Mix 1 volume Lysate TS + 1 volume standard solution                   | Mix 1 volume Lysate TS + 1 volume standard solution             | Mix 1 volume Lysate solution + 1 volume standard solution             | Mix 1 volume Lysate solution + 1 volume standard solution             | Mix 1 volume Lysate solution + 1 volume standard solution             |
| Conditions:                                                   |            |                                                                             |                                                                       |                                                                 |                                                                       |                                                                       |                                                                       |
| Temperature                                                   |            | $37 \pm 19\text{C}$                                                         | $37 \pm 19\text{C}$                                                   | $37 \pm 19\text{C}$                                             | $37 \pm 19\text{C}$                                                   | $37 \pm 19\text{C}$                                                   | $37 \pm 19\text{C}$                                                   |
| Time                                                          |            | $60 \pm 2$ minutes                                                          | $60 \pm 2$ minutes                                                    | $60 \pm 2$ minutes                                              | $60 \pm 2$ minutes                                                    | $60 \pm 2$ minutes                                                    | $60 \pm 2$ minutes                                                    |
| Results<br>(Invert<br>each tube<br>180°)                      | Gel        | +                                                                           | +                                                                     | +                                                               | +                                                                     | +                                                                     | +                                                                     |
|                                                               | No gel     | -                                                                           | -                                                                     | -                                                               | -                                                                     | -                                                                     | -                                                                     |
|                                                               | Valid test | The lowest concentration of the standard solutions shows a (-) result       | The lowest concentration of the standard solutions shows a (-) result | When 0.25 $\lambda$ of the standard solution shows a (-) result | The lowest concentration of the standard solutions shows a (-) result | The lowest concentration of the standard solutions shows a (-) result | The lowest concentration of the standard solutions shows a (-) result |
|                                                               | Endpoint   | The lowest concentration that clots the lysate                              | The smallest concentration that clots the lysate                      | The last (+) test                                               | The lowest concentration that clots the lysate                        | The lowest concentration that clots the lysate                        | The lowest concentration that clots the lysate                        |
| Geometric mean end-point concentration                        |            | Geometric mean end-point concentration = $\text{antilog } \frac{\sum e}{f}$ |                                                                       |                                                                 |                                                                       |                                                                       |                                                                       |

|                                                                                                                                                                       |                                                                                                                                                                                                                                                                                                                                                  |                                                                                                                                                                           |                                                     |                                                                                                                                         |                                                                                                                                         |                                                                                                                                         |
|-----------------------------------------------------------------------------------------------------------------------------------------------------------------------|--------------------------------------------------------------------------------------------------------------------------------------------------------------------------------------------------------------------------------------------------------------------------------------------------------------------------------------------------|---------------------------------------------------------------------------------------------------------------------------------------------------------------------------|-----------------------------------------------------|-----------------------------------------------------------------------------------------------------------------------------------------|-----------------------------------------------------------------------------------------------------------------------------------------|-----------------------------------------------------------------------------------------------------------------------------------------|
|                                                                                                                                                                       | <p><math>\Sigma e</math>= The sum of the log endpoint concentrations of the dilution series used</p> <p>f: The number of replicates</p> <p>If the geometric mean endpoint concentration is <math>&gt;0.5\lambda</math> and <math>&lt;2\lambda</math>, the labeled sensitivity is confirmed, and is used in tests performed with this lysate.</p> |                                                                                                                                                                           |                                                     |                                                                                                                                         |                                                                                                                                         |                                                                                                                                         |
| <b>Test for interfering factors</b>                                                                                                                                   | Prepare the solutions (A-D) and perform the inhibition/ enhancement test on the sample solutions at a dilution less than the MVD not containing any detectable endotoxins                                                                                                                                                                        | Prepare the solutions (A-D) and perform the inhibition/ enhancement test on the sample solutions at a dilution less than the MVD not containing any detectable endotoxins | Prepare the solutions A, B, C and D                 | Prepare the solutions A, B, C and D and use the test solutions at a dilution less than the MVD not containing any detectable endotoxins | Prepare the solutions A, B, C and D and use the test solutions at a dilution less than the MVD not containing any detectable endotoxins | Prepare the solutions A, B, C and D and use the test solutions at a dilution less than the MVD not containing any detectable endotoxins |
| <u>Solution A:</u><br>▪ Endotoxin concentration / Solution to which endotoxin is added<br>▪ Diluent<br>▪ Dilution factor<br>▪ Endotoxin concentration<br>▪ Replicates | None / test solution<br><br>-<br>-<br>-<br>4                                                                                                                                                                                                                                                                                                     | None / sample solution<br><br>-<br>-<br>-<br>4                                                                                                                            | 0 / sample solution<br><br>-<br>-<br>-<br>4         | None / test solution<br><br>-<br>-<br>-<br>4                                                                                            | None / test solution<br><br>-<br>-<br>-<br>4                                                                                            | None / test solution<br><br>-<br>-<br>-<br>4                                                                                            |
| <u>Solution B:</u><br>▪ Endotoxin concentration / Solution to which endotoxin is added<br>▪ Diluent                                                                   | $2\lambda$ / test solution<br><br>Test solution                                                                                                                                                                                                                                                                                                  | $2\lambda$ / sample solution<br><br>Sample solution                                                                                                                       | $2\lambda$ / sample solution<br><br>Sample solution | $2\lambda$ / test solution<br><br>Test solution                                                                                         | $2\lambda$ / test solution<br><br>Test solution                                                                                         | $2\lambda$ / test solution<br><br>Test solution                                                                                         |

|                                                                                                                                                                                                                                                |                                                                             |                                                                             |                                                                             |                                                                             |                                                                             |                                                                             |
|------------------------------------------------------------------------------------------------------------------------------------------------------------------------------------------------------------------------------------------------|-----------------------------------------------------------------------------|-----------------------------------------------------------------------------|-----------------------------------------------------------------------------|-----------------------------------------------------------------------------|-----------------------------------------------------------------------------|-----------------------------------------------------------------------------|
| <ul style="list-style-type: none"> <li>▪ Dilution factors</li> <li>▪ Endotoxin concentrations</li> <li>▪ Replicates</li> </ul>                                                                                                                 | 1-2-4-8<br>2λ-1λ-0.5λ-0.25λ<br>4                                            | 1-2-4-8<br>2λ-1λ-0.5λ-0.25λ<br>4                                            | 1-2-4-8<br>2λ-1λ-0.5λ-0.25λ<br>4                                            | 1-2-4-8<br>2λ-1λ-0.5λ-0.25λ<br>4                                            | 1-2-4-8<br>2λ-1λ-0.5λ-0.25λ<br>4                                            | 1-2-4-8<br>2λ-1λ-0,5λ-0,25λ<br>4                                            |
| <u>Solution C:</u> <ul style="list-style-type: none"> <li>▪ Endotoxin concentration / Solution to which endotoxin is added</li> <li>▪ Diluent</li> <li>▪ Dilution factors</li> <li>▪ Endotoxin concentrations</li> <li>▪ Replicates</li> </ul> | 2λ / water for BET<br><br>Water for BET<br>1-2-4-8<br>2λ-1λ-0.5λ-0.25λ<br>2 | 2λ / water for BET<br><br>Water for BET<br>1-2-4-8<br>2λ-1λ-0.5λ-0.25λ<br>2 | 2λ / water for BET<br><br>Water for BET<br>1-2-4-8<br>2λ-1λ-0.5λ-0.25λ<br>2 | 2λ / water for BET<br><br>Water for BET<br>1-2-4-8<br>2λ-1λ-0.5λ-0.25λ<br>2 | 2λ / water for BET<br><br>Water for BET<br>1-2-4-8<br>2λ-1λ-0.5λ-0.25λ<br>2 | 2λ / water for BET<br><br>Water for BET<br>1-2-4-8<br>2λ-1λ-0,5λ-0,25λ<br>2 |
| <u>Solution D:</u> <ul style="list-style-type: none"> <li>▪ Endotoxin concentration / Solution to which endotoxin is added</li> <li>▪ Diluent</li> <li>▪ Dilution factor</li> <li>▪ Endotoxin concentration</li> <li>▪ Replicates</li> </ul>   | None / water for BET<br><br>-<br>-<br>-<br>2                                | None / water for BET<br><br>-<br>-<br>-<br>2                                | 0 / water for BET<br><br>-<br>-<br>-<br>2                                   | None / water for BET<br><br>-<br>-<br>-<br>2                                | None /water for BET<br><br>-<br>-<br>-<br>2                                 | None / water for BET<br><br>-<br>-<br>-<br>2                                |

[illegible]

|                                                                                                                |                                                                                                                                    |                                                                                                                                    |                                                                                                                                                                    |                                                                                                                                    |                                                                                                                                    |                                                                                                                                    |
|----------------------------------------------------------------------------------------------------------------|------------------------------------------------------------------------------------------------------------------------------------|------------------------------------------------------------------------------------------------------------------------------------|--------------------------------------------------------------------------------------------------------------------------------------------------------------------|------------------------------------------------------------------------------------------------------------------------------------|------------------------------------------------------------------------------------------------------------------------------------|------------------------------------------------------------------------------------------------------------------------------------|
| <u><b>Solution A:</b></u><br>Endotoxin concentration/<br>Solution to which<br>endotoxin is added<br>Replicates | None / Diluted test solution<br><br>2                                                                                              | None / Diluted sample<br>solution<br><br>2                                                                                         | 0 / Sample solution<br><br>2                                                                                                                                       | None / Diluted test<br>solution<br><br>2                                                                                           | None / Diluted test<br>solution<br><br>2                                                                                           | None / Diluted test<br>solution<br><br>2                                                                                           |
| <u><b>Solution B:</b></u><br>Endotoxin concentration/<br>Solution to which<br>endotoxin is added<br>Replicates | 2λ / Diluted test solution<br><br>2                                                                                                | 2λ / Diluted sample solution<br><br>2                                                                                              | 2λ / sample solution<br><br>2                                                                                                                                      | 2λ / Diluted test solution<br><br>2                                                                                                | 2λ / Diluted test solution<br><br>2                                                                                                | 2λ / Diluted test solution<br><br>2                                                                                                |
| <u><b>Solution C:</b></u><br>Endotoxin concentration/<br>Solution to which<br>endotoxin is added<br>Replicates | 2λ / water for BET<br><br>2                                                                                                        | 2λ / water for BET<br><br>2                                                                                                        | 2λ / water for BET<br><br>2                                                                                                                                        | 2λ / water for BET<br><br>2                                                                                                        | 2λ / water for BET<br><br>2                                                                                                        | 2λ / water for BET<br><br>2                                                                                                        |
| <u><b>Solution D:</b></u><br>Endotoxin concentration/<br>Solution to which<br>endotoxin is added<br>Replicates | None / water for BET<br><br>2                                                                                                      | None / water for BET<br><br>2                                                                                                      | 0 / water for BET<br><br>2                                                                                                                                         | None / water for BET<br><br>2                                                                                                      | None / water for BET<br><br>2                                                                                                      | None / water for BET<br><br>2                                                                                                      |
| <b>Interpretation</b>                                                                                          | Test valid:<br>▪ both replicates of B and C<br>are (+) and those of D are<br>(-).<br>▪ (-) result for both<br>replicates of sol. A | Test valid:<br>▪ both replicates of B and C<br>are (+) and those of D are<br>(-).<br>▪ (-) result for both<br>replicates of sol. A | Test valid:<br>▪ both replicates of B and C<br>are (+) and those of D are (-).<br>▪ (-) result for both replicates<br>of sol. A.<br>A (+) result for one replicate | Test valid:<br>▪ both replicates of B and<br>C are (+) and those of D<br>are (-).<br>▪ (-) result for both<br>replicates of sol. A | Test valid:<br>▪ both replicates of B and<br>C are (+) and those of D are<br>(-).<br>▪ (-) result for both<br>replicates of sol. A | Test valid:<br>▪ both replicates of B and<br>C are (+) and those of D<br>are (-).<br>▪ (-) result for both<br>replicates of sol. A |

|                                                                                                                                                                       |                                                                                                                            |                                                                                                                                  |                                                                                                                                                                                                                                                                               |                                                                                                                            |                                                                                                                            |                                                                                                                            |
|-----------------------------------------------------------------------------------------------------------------------------------------------------------------------|----------------------------------------------------------------------------------------------------------------------------|----------------------------------------------------------------------------------------------------------------------------------|-------------------------------------------------------------------------------------------------------------------------------------------------------------------------------------------------------------------------------------------------------------------------------|----------------------------------------------------------------------------------------------------------------------------|----------------------------------------------------------------------------------------------------------------------------|----------------------------------------------------------------------------------------------------------------------------|
|                                                                                                                                                                       | A (+) result for one replicate of A and a (-) result for the other, repeat the test.                                       | A (+) result for one replicate of A and a (-) result for the other, repeat the test.                                             | of sol. A and a (-) result for the other, repeat the test.                                                                                                                                                                                                                    | A (+) result for one replicate of A and a (-) result for the other, repeat the test.                                       | A (+) result for one replicate of A and a (-) result for the other, repeat the test.                                       | A (+) result for one replicate of A and a (-) result for the other, repeat the test.                                       |
| <b>Quantitative test</b>                                                                                                                                              | <b>IP</b>                                                                                                                  | <b>USP</b>                                                                                                                       | <b>JP</b>                                                                                                                                                                                                                                                                     | <b>EP</b>                                                                                                                  | <b>BP</b>                                                                                                                  | <b>RFE</b>                                                                                                                 |
| <b>Procedure</b>                                                                                                                                                      | Prepare solutions A, B, C and D.<br><br>Test these solutions according to Confirmation of the labelled lysate sensitivity. | Prepare solutions A, B, C and D.<br><br>Test these solutions following the test Confirmation of the labelled lysate sensitivity. | Prepare solutions A, B, C and D.<br><br>When preparing solutions A and B, use sample solutions complying with the test for interfering factors.<br><br>Concerning the test conditions, follow the procedure described in the confirmation of the labelled lysate sensitivity. | Prepare solutions A, B, C and D.<br><br>Test these solutions according to Confirmation of the labelled lysate sensitivity. | Prepare solutions A, B, C and D.<br><br>Test these solutions according to Confirmation of the labelled lysate sensitivity. | Prepare solutions A, B, C and D.<br><br>Test these solutions according to Confirmation of the labelled lysate sensitivity. |
| <u>Solution A:</u><br>▪ Endotoxin concentration / Solution to which endotoxin is added<br>▪ Diluent<br>▪ Dilution factor<br>▪ Endotoxin concentration<br>▪ Replicates | None / sample solution<br><br>Water for BET<br>1-2-4-8<br>-<br>2                                                           | None / sample solution<br><br>Water for BET<br>1-2-4-8<br>-<br>2                                                                 | 0 / sample solution<br><br>Water for BET<br>1-2-4-8<br>-<br>2                                                                                                                                                                                                                 | None / test solution<br><br>Water for BET<br>1-2-4-8<br>-<br>2                                                             | None / test solution<br><br>Water for BET<br>1-2-4-8<br>-<br>2                                                             | None / test solution<br><br>Water for BET<br>1-2-4-8<br>-<br>2                                                             |



|                                                                                                                                                                         |                                                                             |                                                                             |                                                                             |                                                                             |                                                                             |                                                                             |
|-------------------------------------------------------------------------------------------------------------------------------------------------------------------------|-----------------------------------------------------------------------------|-----------------------------------------------------------------------------|-----------------------------------------------------------------------------|-----------------------------------------------------------------------------|-----------------------------------------------------------------------------|-----------------------------------------------------------------------------|
| <u>Solution B:</u><br>▪ Endotoxin concentration / Solution to which endotoxin is added<br>▪ Diluent<br>▪ Dilution factors<br>▪ Endotoxin concentrations<br>▪ Replicates | 2λ / sample solution<br><br>-<br>1<br>2λ<br>2                               | 2λ / sample solution<br><br>-<br>1<br>2λ<br>2                               | 2λ / sample solution<br><br>-<br>1<br>2λ<br>2                               | 2λ / test solution<br><br>-<br>1<br>2λ<br>2                                 | 2λ / test solution<br><br>-<br>1<br>2λ<br>2                                 | 2λ / test solution<br><br>-<br>1<br>2λ<br>2                                 |
| <u>Solution C:</u><br>▪ Endotoxin concentration / Solution to which endotoxin is added<br>▪ Diluent<br>▪ Dilution factors<br>▪ Endotoxin concentrations<br>▪ Replicates | 2λ / water for BET<br><br>Water for BET<br>1-2-4-8<br>2λ-1λ-0.5λ-0.25λ<br>2 | 2λ / water for BET<br><br>Water for BET<br>1-2-4-8<br>2λ-1λ-0.5λ-0.25λ<br>2 | 2λ / water for BET<br><br>Water for BET<br>1-2-4-8<br>2λ-1λ-0.5λ-0.25λ<br>2 | 2λ / water for BET<br><br>Water for BET<br>1-2-4-8<br>2λ-1λ-0.5λ-0.25λ<br>2 | 2λ / water for BET<br><br>Water for BET<br>1-2-4-8<br>2λ-1λ-0.5λ-0.25λ<br>2 | 2λ / water for BET<br><br>Water for BET<br>1-2-4-8<br>2λ-1λ-0.5λ-0.25λ<br>2 |
| <u>Solution D:</u><br>▪ Endotoxin concentration / Solution to which endotoxin is added<br>▪ Diluent<br>▪ Dilution factor                                                | None / water for BET<br><br>-<br>-<br>-                                     | None / water for BET<br><br>-<br>-<br>-                                     | 0 / water for BET<br><br>-<br>-<br>-                                        | None /water for BET<br><br>-<br>-<br>-                                      | None /water for BET<br><br>-<br>-<br>-                                      | None /water for BET<br><br>-<br>-<br>-                                      |

|                                                |                                                                                                                                                                                                                       |                                                                                                                                                                                                                       |                                                                                                                                                                                                     |                                                                                                                                                                                                              |                                                                                                                                                                                                              |                                                                                                                                                                                                              |
|------------------------------------------------|-----------------------------------------------------------------------------------------------------------------------------------------------------------------------------------------------------------------------|-----------------------------------------------------------------------------------------------------------------------------------------------------------------------------------------------------------------------|-----------------------------------------------------------------------------------------------------------------------------------------------------------------------------------------------------|--------------------------------------------------------------------------------------------------------------------------------------------------------------------------------------------------------------|--------------------------------------------------------------------------------------------------------------------------------------------------------------------------------------------------------------|--------------------------------------------------------------------------------------------------------------------------------------------------------------------------------------------------------------|
| ▪ Endotoxin concentration<br>▪ Replicates      | 2                                                                                                                                                                                                                     | 2                                                                                                                                                                                                                     | 2                                                                                                                                                                                                   | 2                                                                                                                                                                                                            | 2                                                                                                                                                                                                            | 2                                                                                                                                                                                                            |
| <b>Calculation and interpretation</b>          | Test is valid if:<br>▪ Both replicates of sol. D are (-)<br>▪ Both replicates of sol. B are (+)<br>▪ Geometric mean end-point concentration of sol. C is in the range of $0.5\lambda$ to $2\lambda$                   | Test is valid if:<br>▪ Both replicates of sol. D are (-)<br>▪ Both replicates of sol. B are (+)<br>▪ Geometric mean end-point concentration of sol. C is in the range of $0.5\lambda$ to $2\lambda$                   | Test is valid if:<br>▪ Both replicates of sol. D are (-)<br>▪ Both replicates of sol. B are (+)<br>▪ Geometric mean end-point concentration of sol. C is in the range of $0.5\lambda$ to $2\lambda$ | Test is valid if:<br>▪ Both replicates of sol. D are (-)<br>▪ Both replicates of sol. B are (+)<br>▪ Geometric mean end-point concentration of sol. C is in the range of $0.5\lambda$ to $2\lambda$          | Test is valid if:<br>▪ Both replicates of sol. D are (-)<br>▪ Both replicates of sol. B are (+)<br>▪ Geometric mean end-point concentration of sol. C is in the range of $0.5\lambda$ to $2\lambda$          | Test is valid if:<br>▪ Both replicates of sol. D are (-)<br>▪ Both replicates of sol. B are (+)<br>▪ Geometric mean end-point concentration of sol. C is in the range of $0.5\lambda$ to $2\lambda$          |
| Endotoxin concentration of sol. A:             | Calculate the end-point concentration for each replicate by multiplying each end-point dilution factor by $\lambda$ .                                                                                                 | Calculate the end-point concentration for each replicate by multiplying each end-point dilution factor by $\lambda$ .                                                                                                 | The endpoint is defined as the maximum dilution showing the last positive test in the dilution series of solution A                                                                                 | Calculate the end-point concentration for each replicate by multiplying each end-point dilution factor by $\lambda$ .                                                                                        | Calculate the end-point concentration for each replicate by multiplying each end-point dilution factor by $\lambda$ .                                                                                        | Calculate the end-point concentration for each replicate by multiplying each end-point dilution factor by $\lambda$ .                                                                                        |
| Endotoxin concentration in the sample solution | It is the end-point concentration of the replicates. If the test is conducted with a diluted sample solution, calculate the concentration of endotoxin in the original sample solution by multiplying by the dilution | It is the end-point concentration of the replicates. If the test is conducted with a diluted sample solution, calculate the concentration of endotoxin in the original sample solution by multiplying by the dilution | It is calculated by multiplying the endpoint dilution factor by $\lambda$ .                                                                                                                         | It is the end-point concentration of the replicates. If the test is conducted with a diluted sample solution, calculate the concentration of endotoxin in the original sample solution by multiplying by the | It is the end-point concentration of the replicates. If the test is conducted with a diluted sample solution, calculate the concentration of endotoxin in the original sample solution by multiplying by the | It is the end-point concentration of the replicates. If the test is conducted with a diluted sample solution, calculate the concentration of endotoxin in the original sample solution by multiplying by the |

|                             | factor.                                                                                                                                                                     | factor.                                                                                                                                                                     |                                                                                                                                                                                                             | dilution factor.                                                                                                                                                            | dilution factor.                                                                                                                                                            | dilution factor.                                                                                                                                                            |
|-----------------------------|-----------------------------------------------------------------------------------------------------------------------------------------------------------------------------|-----------------------------------------------------------------------------------------------------------------------------------------------------------------------------|-------------------------------------------------------------------------------------------------------------------------------------------------------------------------------------------------------------|-----------------------------------------------------------------------------------------------------------------------------------------------------------------------------|-----------------------------------------------------------------------------------------------------------------------------------------------------------------------------|-----------------------------------------------------------------------------------------------------------------------------------------------------------------------------|
| If none of dilutions is (+) | Report the endotoxin concentration as less than $\lambda$                                                                                                                   | Report the endotoxin concentration as less than $\lambda$                                                                                                                   | Report the endotoxin concentration as less than $\lambda \times$ the lowest dilution factor of the sample solution                                                                                          | Report the endotoxin concentration as less than $\lambda$                                                                                                                   | Report the endotoxin concentration as less than $\lambda$                                                                                                                   | Report the endotoxin concentration as less than $\lambda$                                                                                                                   |
| If all dilutions are (+)    | Reported as equal to or greater than the largest dilution factor multiplied by $\lambda$                                                                                    | Reported as equal to or greater than the largest dilution factor multiplied by $\lambda$                                                                                    | reported as equal to or greater than the greatest dilution factor of solution A multiplied by $\lambda$ .                                                                                                   | Reported as equal to or greater than the largest dilution factor multiplied by $\lambda$                                                                                    | Reported as equal to or greater than the largest dilution factor multiplied by $\lambda$                                                                                    | Reported as equal to or greater than the largest dilution factor multiplied by $\lambda$                                                                                    |
|                             | The preparation under test meets the requirements of the test if the concentration of endotoxin in both replicates is less than that specified in the individual monograph. | The preparation under test meets the requirements of the test if the concentration of endotoxin in both replicates is less than that specified in the individual monograph. | The sample complies with the Bacterial Endotoxins Test if the endotoxin concentration of the sample in both replicates meets the requirement for the endotoxin limit specified in the individual monograph. | The preparation under test meets the requirements of the test if the concentration of endotoxin in both replicates is less than that specified in the individual monograph. | The preparation under test meets the requirements of the test if the concentration of endotoxin in both replicates is less than that specified in the individual monograph. | The preparation under test meets the requirements of the test if the concentration of endotoxin in both replicates is less than that specified in the individual monograph. |

**Table S3:** Comparative analysis of the Photometric quantitative techniques between IP, USP, JP, EP and also BP and RFE

| Photometric quantitative techniques |           | IP        | USP | JP | EP       | BP       | RFE      |
|-------------------------------------|-----------|-----------|-----|----|----------|----------|----------|
| Turbidimetric                       | End-point | Method B  |     |    | Method F | Method F | Method F |
|                                     | Kinetic   |           |     |    | Method C | Method C | Method C |
| Chromogenic                         | End-point | Method C  |     |    | Method E | Method E | Method E |
|                                     | Kinetic   |           |     |    | Method D | Method D | Method D |
| Temperature                         |           | 37 ± 1 °C |     |    |          |          |          |

| Criteria for the standard curve                                               | IP                                                                                      | USP                           | JP                          | EP                                                                                      | BP                                                                                      | RFE                                                                                     |
|-------------------------------------------------------------------------------|-----------------------------------------------------------------------------------------|-------------------------------|-----------------------------|-----------------------------------------------------------------------------------------|-----------------------------------------------------------------------------------------|-----------------------------------------------------------------------------------------|
| Endotoxin concentrations within the range                                     | 3                                                                                       | 3                             | 3                           | 3                                                                                       | 3                                                                                       | 3                                                                                       |
| Replicates of each standard endotoxin solution                                | 3                                                                                       | 3                             | 3                           | 3                                                                                       | 3                                                                                       | 3                                                                                       |
| r                                                                             | ≥ 0,980                                                                                 | ≥ 0,980                       | ≥ 0,980                     | ≥ 0,980                                                                                 | ≥ 0,980                                                                                 | ≥ 0,980                                                                                 |
| <b>Test for interfering factors</b>                                           | Select an endotoxin concentration at or near the middle of the endotoxin standard curve |                               |                             | Select an endotoxin concentration at or near the middle of the endotoxin standard curve | Select an endotoxin concentration at or near the middle of the endotoxin standard curve | Select an endotoxin concentration at or near the middle of the endotoxin standard curve |
| <u>Solution A:</u><br>▪ Endotoxin concentration<br>▪ Solution<br>▪ Replicates | (-)<br>Sample solution<br>≥ 2                                                           | (-)<br>Sample solution<br>≥ 2 | 0<br>Sample solution<br>≥ 2 | (-)<br>Test solution<br>≥ 2                                                             | (-)<br>Test solution<br>≥ 2                                                             | (-)<br>Test solution<br>≥ 2                                                             |
| <u>Solution B:</u>                                                            |                                                                                         |                               |                             |                                                                                         |                                                                                         |                                                                                         |

|                                                                                                                                           |                                                                                                                          |                                                                                                                          |                                                                                                                          |                                                                                                                          |                                                                                                                          |                                                                                                                          |
|-------------------------------------------------------------------------------------------------------------------------------------------|--------------------------------------------------------------------------------------------------------------------------|--------------------------------------------------------------------------------------------------------------------------|--------------------------------------------------------------------------------------------------------------------------|--------------------------------------------------------------------------------------------------------------------------|--------------------------------------------------------------------------------------------------------------------------|--------------------------------------------------------------------------------------------------------------------------|
| <ul style="list-style-type: none"> <li>▪ Endotoxin concentration</li> <li>▪ Solution</li> <li>▪ Replicates</li> </ul>                     | Middle concentration of the standard curve<br>Sample solution<br>≥ 2                                                     | Middle concentration of the standard curve<br>Sample solution<br>≥ 2                                                     | Middle concentration of the standard curve<br>Sample solution<br>≥ 2                                                     | Middle concentration of the standard curve<br>Test solution<br>≥ 2                                                       | Middle concentration of the standard curve<br>Test solution<br>≥ 2                                                       | Middle concentration of the standard curve<br>Test solution<br>≥ 2                                                       |
| <u>Solution C:</u> <ul style="list-style-type: none"> <li>▪ Endotoxin concentration</li> <li>▪ Solution</li> <li>▪ Replicates</li> </ul>  | ≥ 3 concentrations (lowest C is designated λ). Water for BET Each concentration ≥ 2                                      | ≥ 3 concentrations (lowest C is designated λ). Water for BET Each concentration ≥ 2                                      | ≥ 3 concentrations (lowest C is designated λ). Water for BET Each concentration ≥ 2                                      | ≥ 3 concentrations (lowest C is designated λ). Water for BET Each concentration ≥ 2                                      | ≥ 3 concentrations (lowest C is designated λ). Water for BET Each concentration ≥ 2                                      | ≥ 3 concentrations (lowest C is designated λ). Water for BET Each concentration ≥ 2                                      |
| <u>Solution D :</u> <ul style="list-style-type: none"> <li>▪ Endotoxin concentration</li> <li>▪ Solution</li> <li>▪ Replicates</li> </ul> | (-)<br>Water for BET<br>≥ 2                                                                                              | (-)<br>Water for BET<br>≥ 2                                                                                              | 0<br>Water for BET<br>≥ 2                                                                                                | (-)<br>Water for BET<br>≥ 2                                                                                              | (-)<br>Water for BET<br>≥ 2                                                                                              | (-)<br>Water for BET<br>≥ 2                                                                                              |
| Result with solution D                                                                                                                    | <ul style="list-style-type: none"> <li>▪ ≤ limit of the blank value</li> <li>▪ &lt; endotoxin detection limit</li> </ul> | <ul style="list-style-type: none"> <li>▪ ≤ limit of the blank value</li> <li>▪ &lt; endotoxin detection limit</li> </ul> | <ul style="list-style-type: none"> <li>▪ ≤ limit of the blank value</li> <li>▪ &lt; endotoxin detection limit</li> </ul> | <ul style="list-style-type: none"> <li>▪ ≤ limit of the blank value</li> <li>▪ &lt; endotoxin detection limit</li> </ul> | <ul style="list-style-type: none"> <li>▪ ≤ limit of the blank value</li> <li>▪ &lt; endotoxin detection limit</li> </ul> | <ul style="list-style-type: none"> <li>▪ ≤ limit of the blank value</li> <li>▪ &lt; endotoxin detection limit</li> </ul> |
| r   of standard curve generated using solution C                                                                                          | ≥ 0,980                                                                                                                  | ≥ 0,980                                                                                                                  | ≥ 0,980                                                                                                                  | ≥ 0,980                                                                                                                  | ≥ 0,980                                                                                                                  | ≥ 0,980                                                                                                                  |
| Mean recovery of the added endotoxin                                                                                                      | 50–200%                                                                                                                  | 50–200%                                                                                                                  | 50–200%                                                                                                                  | 50–200%                                                                                                                  | 50–200%                                                                                                                  | 50–200%                                                                                                                  |

| Procedure             | Follow test for interfering factors                                                                                                                                                                                      |                                                                                                                                                                                                                          |                                                                                                                                                                                                                          |                                                                                                                                                                                                                          |                                                                                                                                                                                                                          |                                                                                                                                                                                                                          |
|-----------------------|--------------------------------------------------------------------------------------------------------------------------------------------------------------------------------------------------------------------------|--------------------------------------------------------------------------------------------------------------------------------------------------------------------------------------------------------------------------|--------------------------------------------------------------------------------------------------------------------------------------------------------------------------------------------------------------------------|--------------------------------------------------------------------------------------------------------------------------------------------------------------------------------------------------------------------------|--------------------------------------------------------------------------------------------------------------------------------------------------------------------------------------------------------------------------|--------------------------------------------------------------------------------------------------------------------------------------------------------------------------------------------------------------------------|
| <b>Calculation</b>    | Endotoxin concentration of solution A using the standard curve generated by C                                                                                                                                            | Endotoxin concentration of solution A using the standard curve generated by C                                                                                                                                            | Endotoxin concentration of solution A using the standard curve generated by C                                                                                                                                            | Endotoxin concentration of solution A using the standard curve generated by C                                                                                                                                            | Endotoxin concentration of solution A using the standard curve generated by C                                                                                                                                            | Endotoxin concentration of solution A using the standard curve generated by C                                                                                                                                            |
| Requirements          | <ul style="list-style-type: none"> <li>▪ Sol. C comply assurance of criteria</li> <li>▪ endotoxin recovery: 50–200%</li> <li>▪ Sol. D: ≤ blank value of the lysate employed or &lt; endotoxin detection limit</li> </ul> | <ul style="list-style-type: none"> <li>▪ Sol. C comply assurance of criteria</li> <li>▪ endotoxin recovery: 50–200%</li> <li>▪ Sol. D: ≤ blank value of the lysate employed or &lt; endotoxin detection limit</li> </ul> | <ul style="list-style-type: none"> <li>▪ <math> r </math> of sol. C: ≥ 0,980</li> <li>▪ endotoxin recovery: 50–200%</li> <li>▪ Sol. D: ≤ blank value of the lysate employed or &lt; endotoxin detection limit</li> </ul> | <ul style="list-style-type: none"> <li>▪ Sol. C comply assurance of criteria</li> <li>▪ endotoxin recovery: 50–200%</li> <li>▪ Sol. D: ≤ blank value of the lysate employed or &lt; endotoxin detection limit</li> </ul> | <ul style="list-style-type: none"> <li>▪ Sol. C comply assurance of criteria</li> <li>▪ endotoxin recovery: 50–200%</li> <li>▪ Sol. D: ≤ blank value of the lysate employed or &lt; endotoxin detection limit</li> </ul> | <ul style="list-style-type: none"> <li>▪ Sol. C comply assurance of criteria</li> <li>▪ endotoxin recovery: 50–200%</li> <li>▪ Sol. D: ≤ blank value of the lysate employed or &lt; endotoxin detection limit</li> </ul> |
| <b>Interpretation</b> | Endotoxin concentration of sol. A < endotoxin detection limit                                                                                                                                                            | Endotoxin concentration of sol. A < endotoxin detection limit                                                                                                                                                            | Endotoxin concentration of sol. A meets the endotoxin detection limit specified in monograph                                                                                                                             | Endotoxin concentration of sol. A < endotoxin detection limit                                                                                                                                                            | Endotoxin concentration of sol. A < endotoxin detection limit                                                                                                                                                            | Endotoxin concentration of sol. A < endotoxin detection limit                                                                                                                                                            |
